# Supplementary material
Source: PubMed Central journal article supplement (PMC7770056)

## **Supplementary Information**

This file contains Supplementary Figure 1. Raw images of immunoblots. Uncropped images of scanned immunoblots shown in Fig. 4g, Fig 4i, Fig. 4j, Fig 4k, and 4l, Extended Data Fig. 1a, Extended Data Fig. 2a, Extended Data Fig. 3a, Extended Data 7j, Extended Data Fig. 8a, Extended Data Fig. 8f, Extended Data Fig. 9b, Extended Data Fig. 9c, and Extended Data Fig. 9d.

Fig.4g

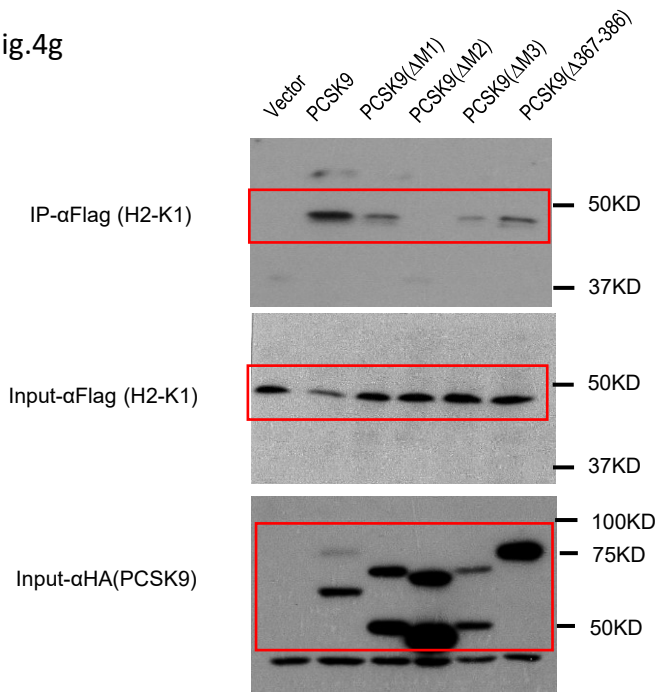

Fig.4i

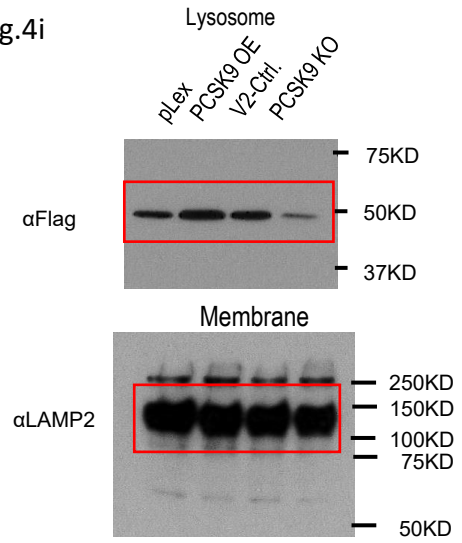

Fig.4j

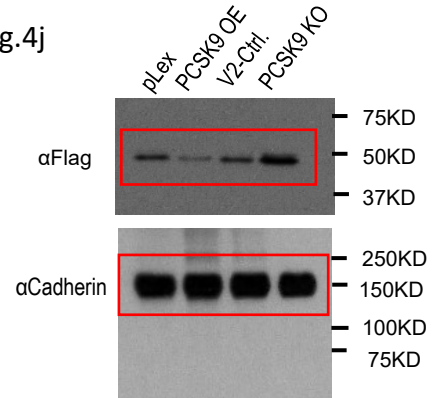

Fig.4k

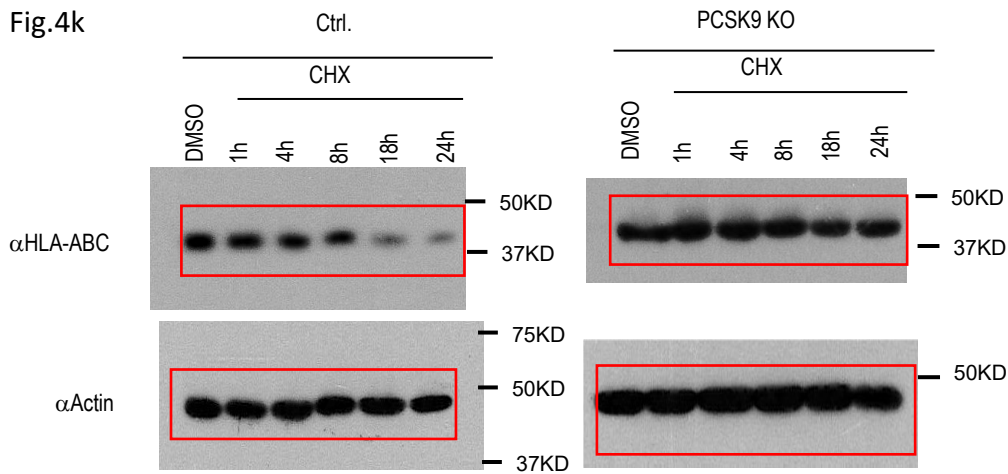

Fig.4l

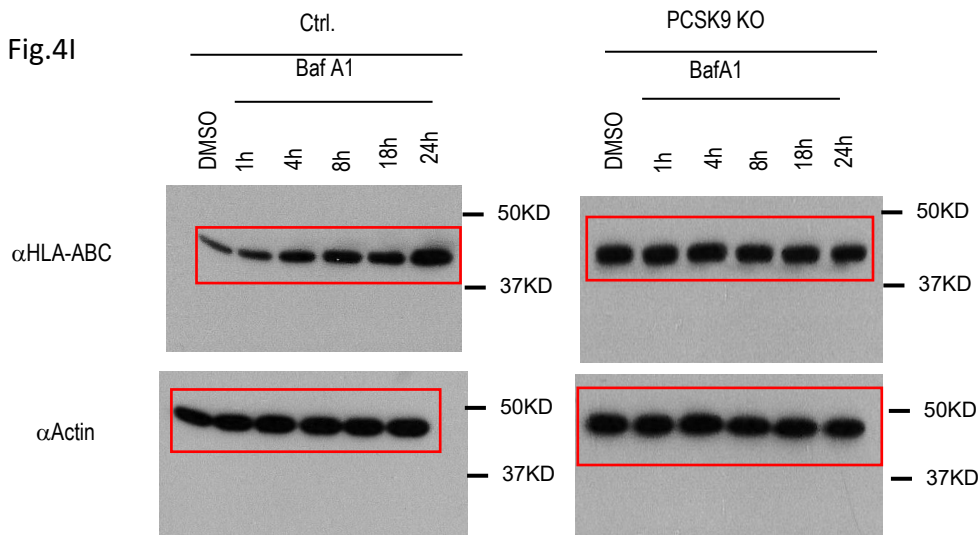

Extended Data Fig.1a

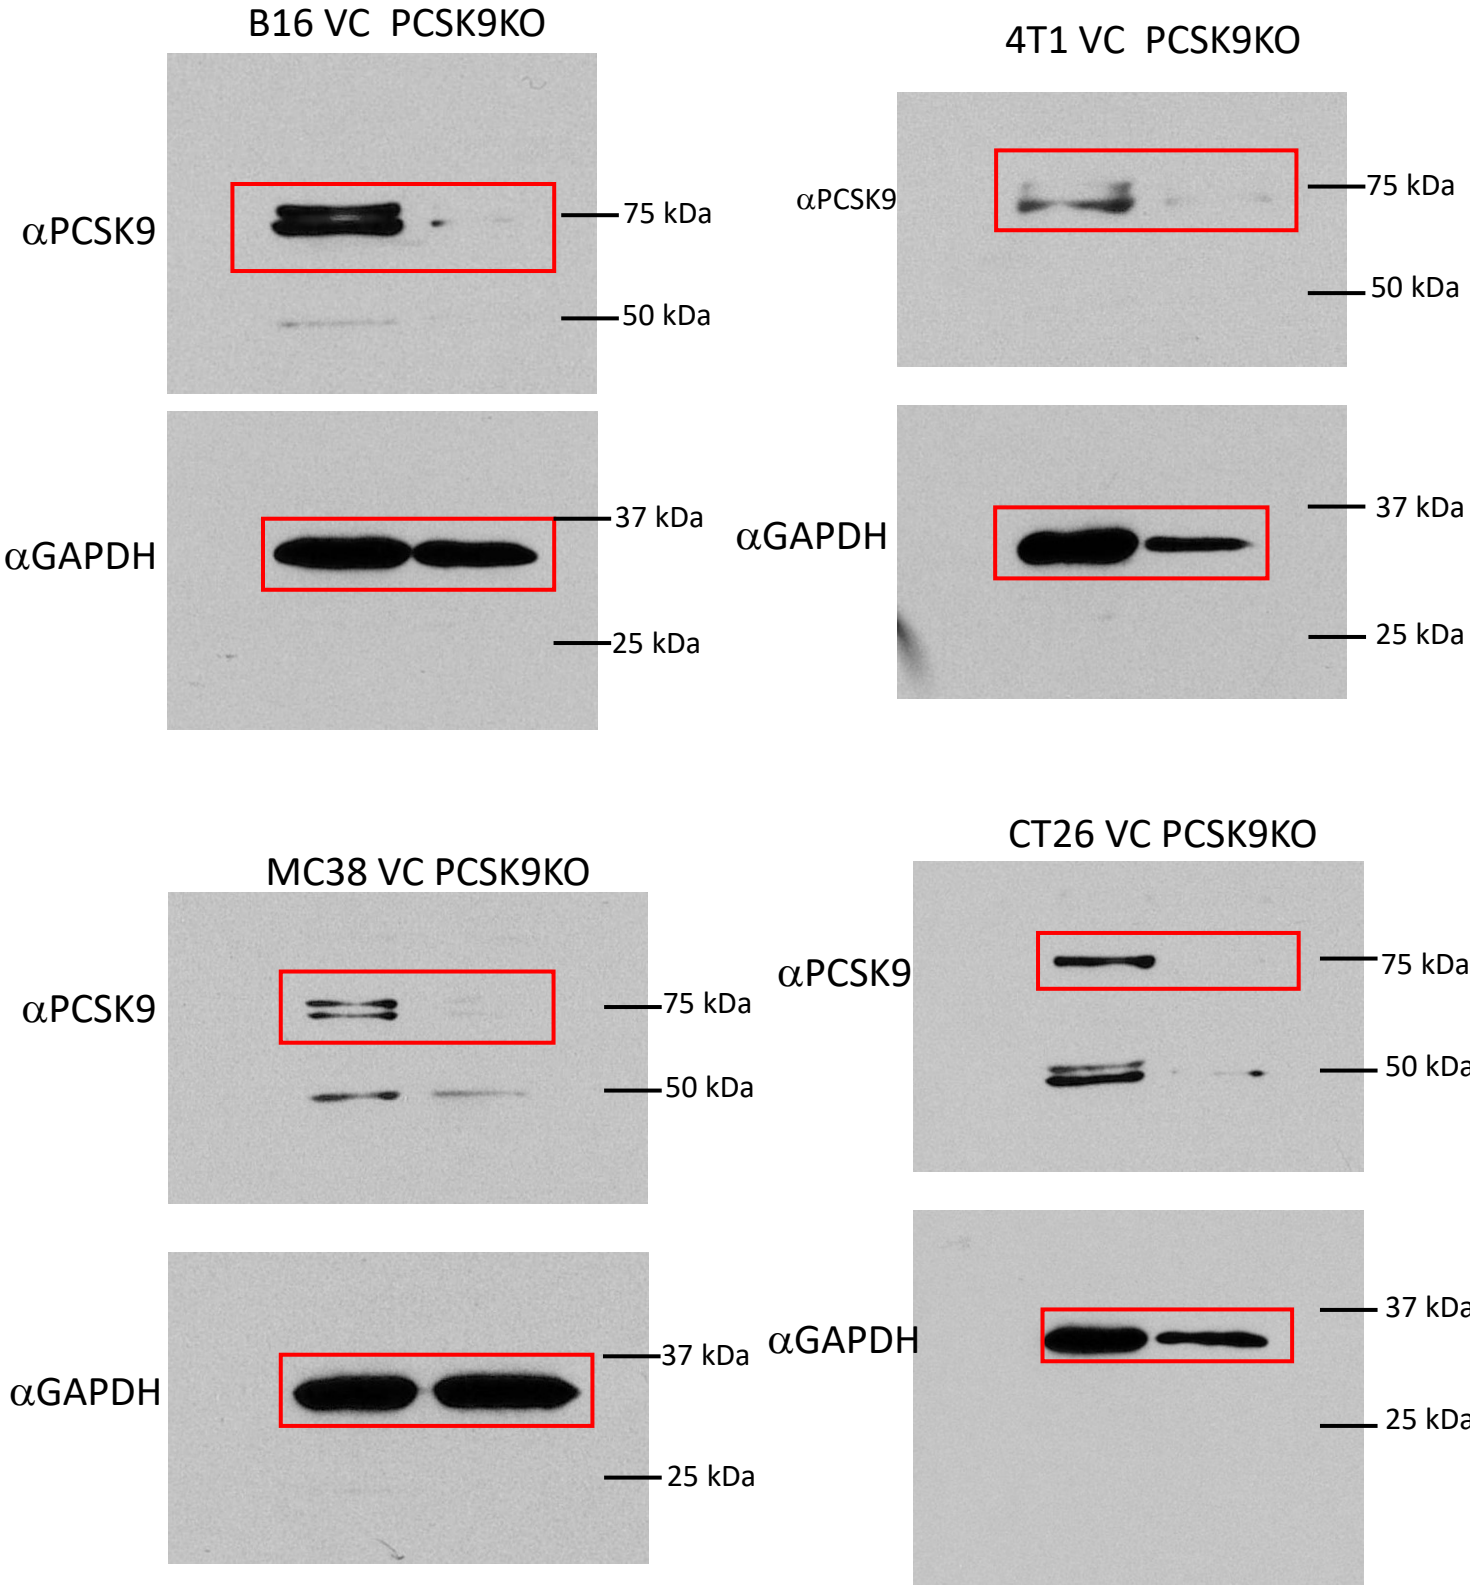

Extended Data Fig.2a

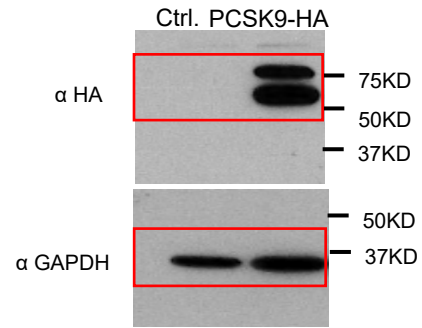

Extended Data Fig.3a

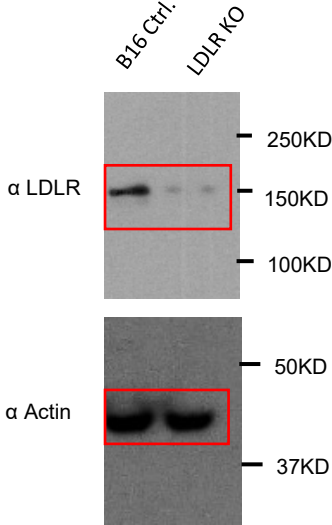

Extended Data Fig.7j

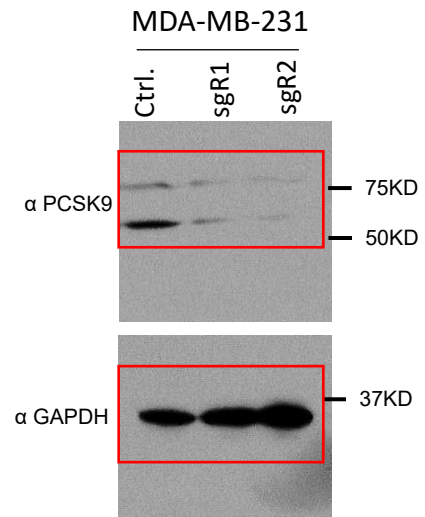

Extended Data Fig.8a

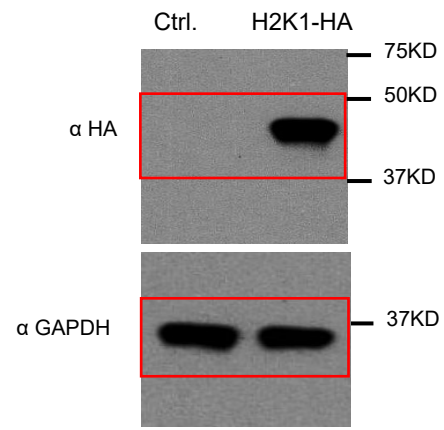

Extended Data Fig.8f

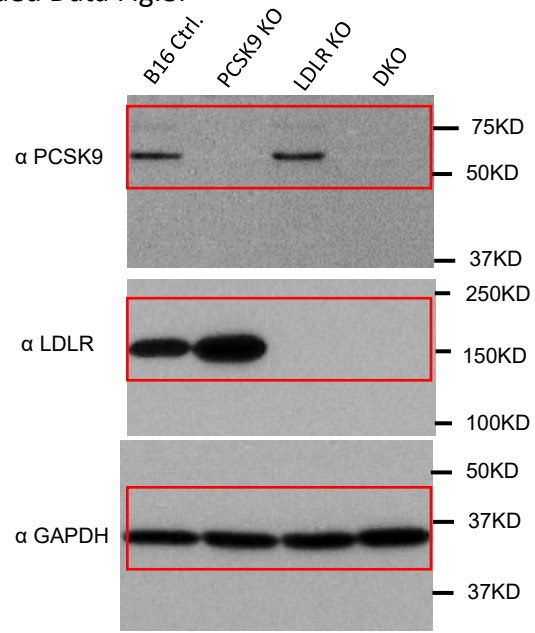



Extended Data Fig.9b

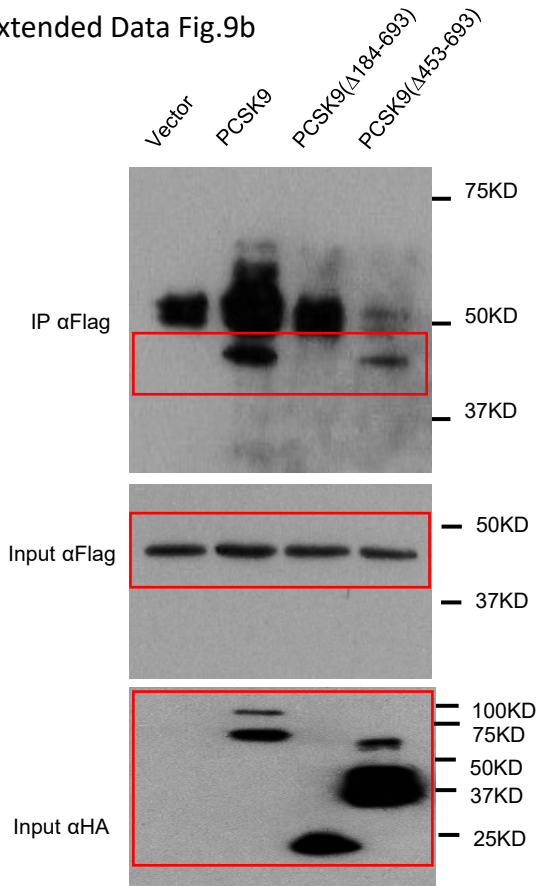

Extended Data Fig.9c

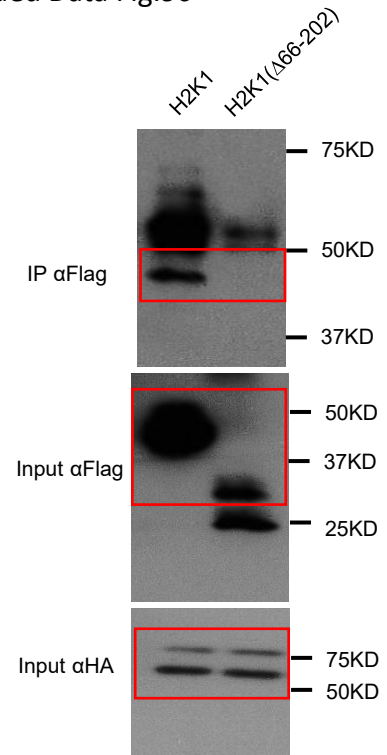

Extended Data Fig.9d

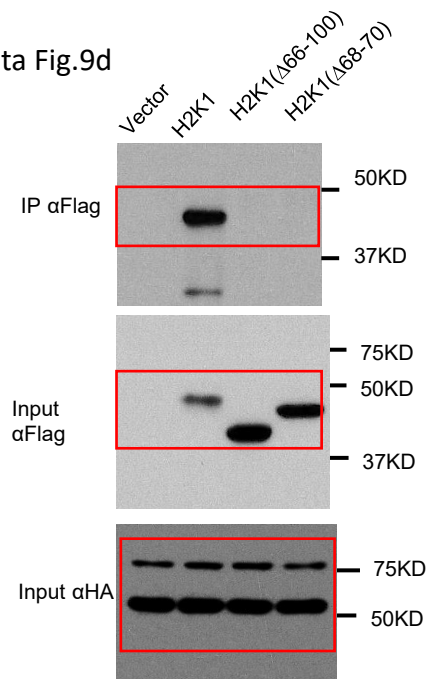

Supplement: NIHMS1623236-supplement-Supplementary_Fig__1.pdf [file NIHMS1623236-supplement-Supplementary_Fig__1.pdf]
